# Supplementary material
Source: PubMed Central journal article supplement (PMC4159143)
Supplement: NIHMS91516-supplement-1_si_001.pdf [file NIHMS91516-supplement-1_si_001.pdf]

Supplementary Information:

Manuscript title: **Trans-Pacific and Regional Atmospheric Transport of Polycyclic Aromatic Hydrocarbons and Pesticides in Biomass Burning Emissions to Western North America**

Authors: Susan A. Genualdi<sup>1</sup>, Robert K. Killin<sup>2</sup>, Jim Woods<sup>3</sup>, Glenn Wilson<sup>4</sup>, David Schmedding<sup>4</sup>, Staci L. Massey Simonich<sup>1,4\*</sup>

**Table of Contents**

|                                                                                                                                                                       |     |
|-----------------------------------------------------------------------------------------------------------------------------------------------------------------------|-----|
| Summary of the Measurement of SOCs and Quality Assurance/Quality Control Procedures.....                                                                              | S2  |
| Figure S.1 Map of air sampling sites in relation to source regions in (A) Asia, Siberia, and the U.S. and (B) in agricultural intensive areas of the western U.S..... | S4  |
| Table S.1 Sampling dates and met data.....                                                                                                                            | S5  |
| Figure S.2 NAAPs model during sampling dates:                                                                                                                         |     |
| a. June 2-4, 2003.....                                                                                                                                                | S6  |
| b. August 4-5, 2003.....                                                                                                                                              | S6  |
| c. June 16-18, 2003 .....                                                                                                                                             | S7  |
| d. September 4-5, 2003.....                                                                                                                                           | S7  |
| Table S.2A PAH concentrations for MPO and CPO samples during 2003.....                                                                                                | S8  |
| Table S.2B Percentage of individual PAHs in the particulate phase for each sampling date.....                                                                         | S9  |
| Figure S.3 PCA biplot for normalized (A) PAH and (B) Pesticide concentrations from MPO and CPO during 2003.....                                                       | S10 |
| Table S.3 Pesticide concentrations for MPO and CPO samples during 2003.....                                                                                           | S11 |
| Table S.4 Significant correlation coefficients (R) between SOCs at MPO.....                                                                                           | S12 |
| Table S.5 Significant correlation coefficients (R) between SOCs at CPO.....                                                                                           | S13 |
| Table S.6. Concentrations of pesticides, PCBs, and their % difference in burned and un-burned soil of the B&B complex fire.....                                       | S14 |

## Measurement of SOCs

The extraction of SOCs from the air sampling media was conducted using an Accelerated Solvent Extractor [17] 300 (Dionex, Sunnyvale, CA). The ASE conditions and solvent compatibility with the sampling media has been described elsewhere [9]. The average percent SOC recoveries (%RSD) from the entire analytical method were 76.7(6.2), 79.3(8.1), and 93.4(2.9) for the QFF, PUF, and XAD-2, respectively [9]. The extracts were concentrated to 300 uL with a stream of nitrogen using a Turbo Vap II (Caliper Life Sciences, Hopkinton, MA) and were analyzed using gas chromatography/mass spectrometry (GC-MS) in selected ion monitoring (SIM) mode [9, 10]. Levoglucosan was measured in the air samples using the method described in Mederios et al [18].

SOCs were extracted from the forest soil samples using the same method for PUF as described elsewhere [9]. The soil extracts were further purified using silica gel adsorption chromatography (Varian, Palo Alto, CA) and a 75:25 hexane:acetone solvent mixture as the elution solvent. The extracts were concentrated with nitrogen and analyzed by GC/MS.

The GC/MS consisted of an Agilent 6890 GC interfaced with an Agilent 5973N mass selective detector. A DB-5ms column (30m, 0.25mm id., 0.25um film thickness, J&W Scientific, USA) was used with an oven temperature program that varied based on the ionization mode of the mass selective detector [10]. Details on the GC temperature programs for both electron capture negative ionization (ECNI) and electron impact ionization (EI), as well as the ions monitored, have been previously reported [10]. The mode of ionization chosen for each SOC was based on which ionization technique gave

the lowest detection limit [10]. EPA method 8280A was used to calculate the estimated detection limits (EDLs) for each SOC in the air samples [19]. For a typical air sample, EDLs ranged from 0.0078 pg/m<sup>3</sup> to 0.19 pg/m<sup>3</sup> in ECNI mode and 0.059 pg/m<sup>3</sup> to 0.73pg/m<sup>3</sup> in EI mode. All reported concentrations were surrogate recovery corrected and field blank subtracted.

### **Quality Assurance/Quality Control Procedures**

Each air sample consisted of both a top and bottom quartz fiber filter (QFF) and the bottom QFF was analyzed separately to check for sorption of gas phase SOCs to the QFF. All SOCs were below the limits of quantitation on the bottom QFF and no correction for SOC sorption was done. The CPO air samples consisted of a two PUF system and the bottom PUF was analyzed separately to check for breakthrough of gas phase SOCs in ~50% of the air samples. Only hexachlorobenzene (HCB) had the potential for gas phase breakthrough and 39 to 44% of the total HCB concentration was measured on the bottom PUF. No correction for the potential breakthrough of HCB was done. However, this suggests that the HCB concentration at CPO may be slightly underestimated. At MPO, a PUF/XAD/PUF gas phase sampling system was used and HCB breakthrough was not observed in the bottom PUF.

Field blanks were collected at both MPO and CPO. At CPO, phenanthrene, fluorene, pyrene, and retene were measured slightly above the quantitation limit, while at MPO, dacthal, chlorpyrifos, HCB, endosulfan I, endosulfan II, endosulfan sulfate, phenanthrene, fluorene, pyrene, and retene were measured slightly above the quantitation limit. All reported concentrations were field blank subtracted.

**Figure S.1.** Map of air sampling locations (Cheeka Peak Observatory – CPO and Mary’s Peak Observatory –MPO) in relation to source regions (boxes) in (A) Asia, Siberia, and the U.S. and (B) urban and agricultural source regions in the United States

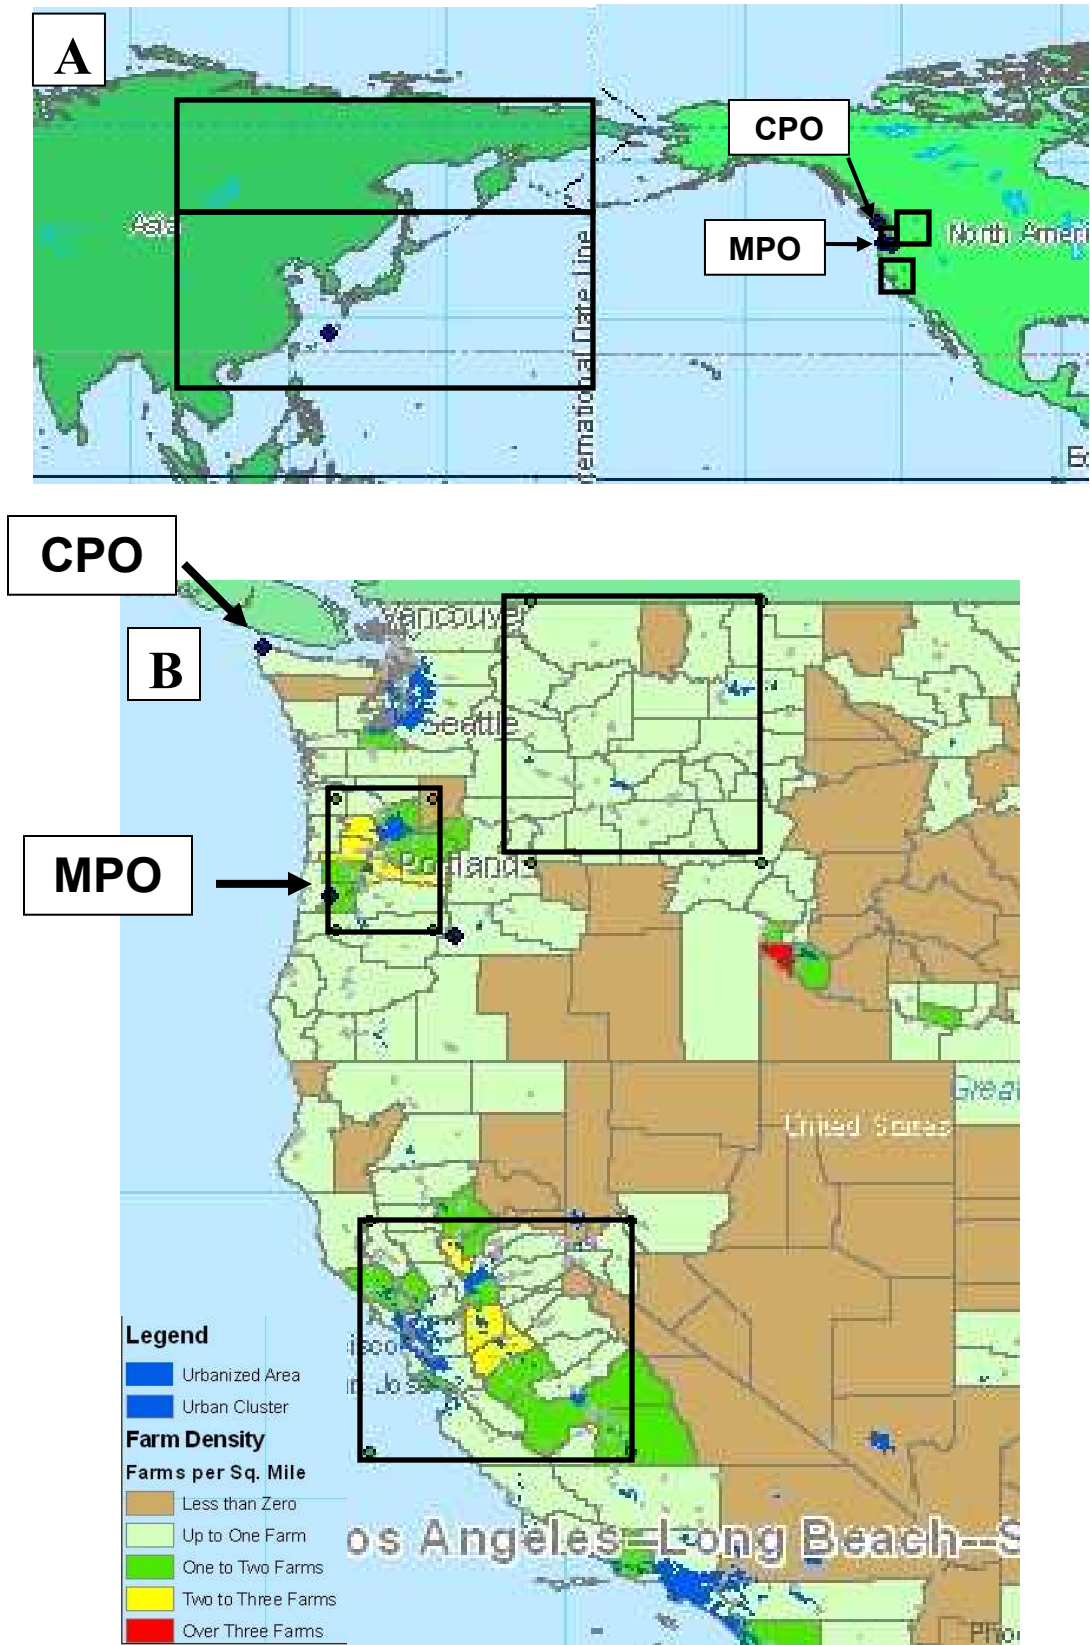

**Table S.1.** Sample, meteorological, and SRIF information for air samples collected at MPO and CPO during 2003. The %PO indicates the percent of time the air mass spent over the Pacific Ocean relative to land masses along the 10 day back trajectory. The %<BL and %>BL refers to the amount of time an air mass spent below and above the boundary layer (BL) prior to sampling.

| Sample # | Sampling Location | Start  | Stop   | Hours Sampled | m3 of air | Avg Temp (°C) | Average Wind Speed (m/s) | Primary Wind Direction | % Pacific Ocean | %<BL | %>BL | %Siberia | % Asia | % Eastern Oregon and Washington | % Western Oregon | % Central California |
|----------|-------------------|--------|--------|---------------|-----------|---------------|--------------------------|------------------------|-----------------|------|------|----------|--------|---------------------------------|------------------|----------------------|
| 1R       | CPO               | 11-Apr | 13-Apr | 48            | 675       | 9.1*          | 5*                       | NE*                    | 87.7            | 81.4 | 18.6 | 17.8     | 17.9   | 1.5                             | 0.7              | 0.0                  |
| 2        | CPO               | 21-Apr | 23-Apr | 48            | 664       | 8.3*          | 8*                       | W*                     | 85.0            | 58.4 | 41.6 | 22.1     | 5.4    | 0.0                             | 1.1              | 0.0                  |
| 3        | CPO               | 2-May  | 4-May  | 48            | 661       | 9.1*          | 3.0                      | W                      | 56.8            | 71.2 | 28.8 | 0.0      | 0.0    | 0.0                             | 0.0              | 0.2                  |
| 4        | MPO               | 11-May | 13-May | 48            | 3041      | 5.0           | 5.3                      | W                      | 29.2            | 18.9 | 81.1 | 0.0      | 0.0    | 4.0                             | 7.1              | 0.0                  |
| 5        | MPO               | 21-May | 23-May | 48            | 3207      | 12.1          | 2.5                      | SW                     | 96.0            | 16.5 | 83.5 | 1.9      | 5.1    | 0.0                             | 0.5              | 0.0                  |
| 6        | MPO               | 26-May | 28-May | 48            | 3207      | NA            | 3.9                      | NE                     | 94.7            | 26.5 | 73.5 | 0.1      | 8.9    | 0.0                             | 0.5              | 0.0                  |
| 7        | MPO               | 30-May | 1-Jun  | 48            | 3207      | 7.7           | 5.2                      | NE                     | 89.2            | 40.5 | 59.5 | 4.8      | 2.8    | 0.0                             | 1.8              | 0.0                  |
| 8S       | MPO               | 2-Jun  | 4-Jun  | 48            | 3207      | 9.4           | 9.1                      | NE                     | 78.1            | 3.8  | 96.2 | 8.5      | 4.7    | 0.0                             | 2.2              | 0.0                  |
| 9S       | CPO               | 2-Jun  | 4-Jun  | 48            | 643       | 12.9*         | 2.7                      | W                      | 88.7            | 32.0 | 68.0 | 1.2      | 0.2    | 0.0                             | 0.0              | 0.0                  |
| 10S      | CPO               | 16-Jun | 18-Jun | 48            | 636       | 14.5*         | 2.0                      | W                      | 93.3            | 45.8 | 54.2 | 8.8      | 4.4    | 0.0                             | 0.0              | 0.0                  |
| 11       | MPO               | 22-Jun | 24-Jun | 48            | 2867      | 4.0           | 6.8                      | NE                     | 89.2            | 25.3 | 74.7 | 3.8      | 2.4    | 0.0                             | 0.7              | 0.0                  |
| 12       | MPO               | 4-Jul  | 6-Jul  | 48            | 2867      | 13.4          | 4.9                      | NE                     | 88.7            | 33.1 | 66.9 | 0.1      | 1.7    | 0.0                             | 0.9              | 0.0                  |
| 13       | CPO               | 7-Jul  | 9-Jul  | 48            | 636       | 13.8*         | 3.2                      | SW                     | 92.2            | 83.5 | 16.5 | 3.9      | 6.9    | 0.0                             | 0.0              | 0.0                  |
| 14       | MPO               | 22-Jul | 24-Jul | 48            | 1794      | 18.4          | 4.4                      | N                      | 90.4            | 16.5 | 83.5 | 2.9      | 21.4   | 0.0                             | 1.8              | 0.0                  |
| 15       | MPO               | 2-Aug  | 4-Aug  | 48            | 1794      | 15.0          | 2.6                      | S                      | 95.0            | 39.9 | 60.1 | 0.8      | 0.6    | 0.0                             | 0.8              | 0.0                  |
| 16S      | MPO               | 4-Aug  | 5-Aug  | 24            | 897       | 17.0          | 3.8                      | SW                     | 87.1            | 52.9 | 47.1 | 4.2      | 0.0    | 0.0                             | 0.6              | 0.0                  |
| 17S      | CPO               | 4-Aug  | 6-Aug  | 48            | 647       | 13.9*         | 2.5                      | SW                     | 83.5            | 80.6 | 19.4 | 1.7      | 0.0    | 0.0                             | 0.0              | 0.0                  |
| 18       | MPO               | 8-Aug  | 10-Aug | 48            | 1794      | 11.9          | 4.9                      | SW                     | 86.2            | 25.8 | 74.2 | 2.6      | 0.2    | 0.0                             | 0.8              | 0.0                  |
| 19       | MPO               | 12-Aug | 14-Aug | 48            | 1794      | 12.0          | 4.6                      | SW                     | 82.2            | 26.6 | 73.4 | 0.0      | 0.0    | 0.0                             | 2.9              | 0.0                  |
| 20R      | MPO               | 4-Sep  | 5-Sep  | 24            | 897       | 23.4          | 2.8                      | SW                     | 77.5            | 56.2 | 43.8 | 3.3      | 0.3    | 2.5                             | 2.5              | 0.0                  |
| 21T      | MPO               | 21-Sep | 22-Sep | 24            | 897       | 11.6          | 13.5                     | NE                     | 78.2            | 6.0  | 94.0 | 12.6     | 20.9   | 0.0                             | 1.9              | 0.0                  |

\* CPO data from met station in Quillayute, WA

S = influenced by Siberian biomass burning

R = influenced by regional biomass burning

T = influenced by trans-Pacific transport

**Figure S.2** NAAPs model images depicting the smoke optical depth in sampled air masses influenced by Siberian biomass burning emissions (A, B, and C) and a regional forest fire (D). The legend represents the smoke mass mixing ratio ( $\mu\text{g} / \text{m}^3$ ) at the surface. The contouring begins at  $0.1 \mu\text{g} / \text{m}^3$  and doubles in magnitude for each successive contour [1].

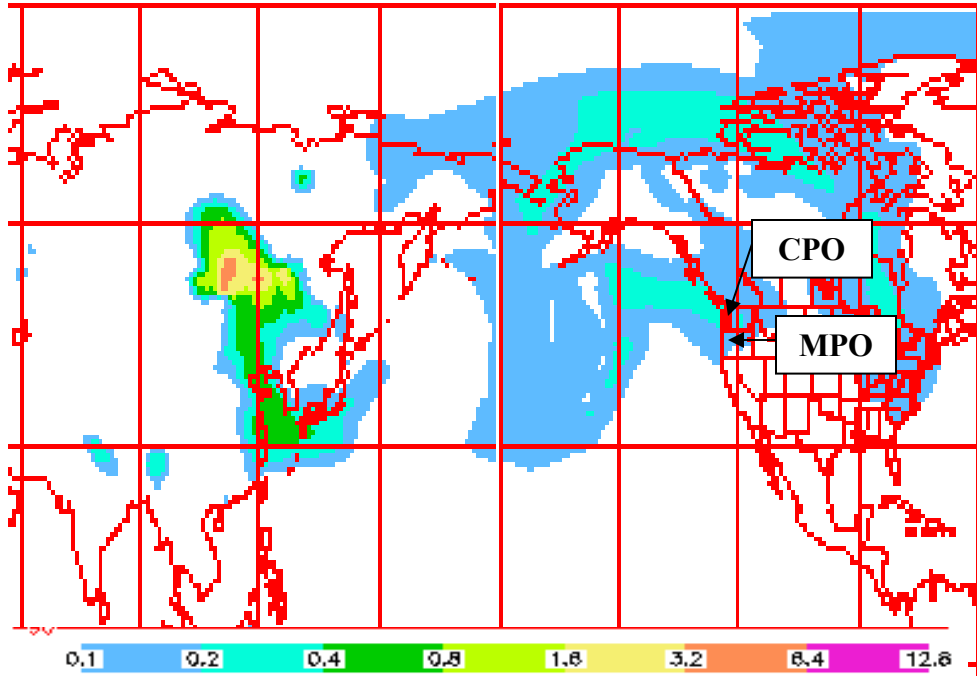

A. Representative image during the June 2 concurrent sampling at CPO and MPO.

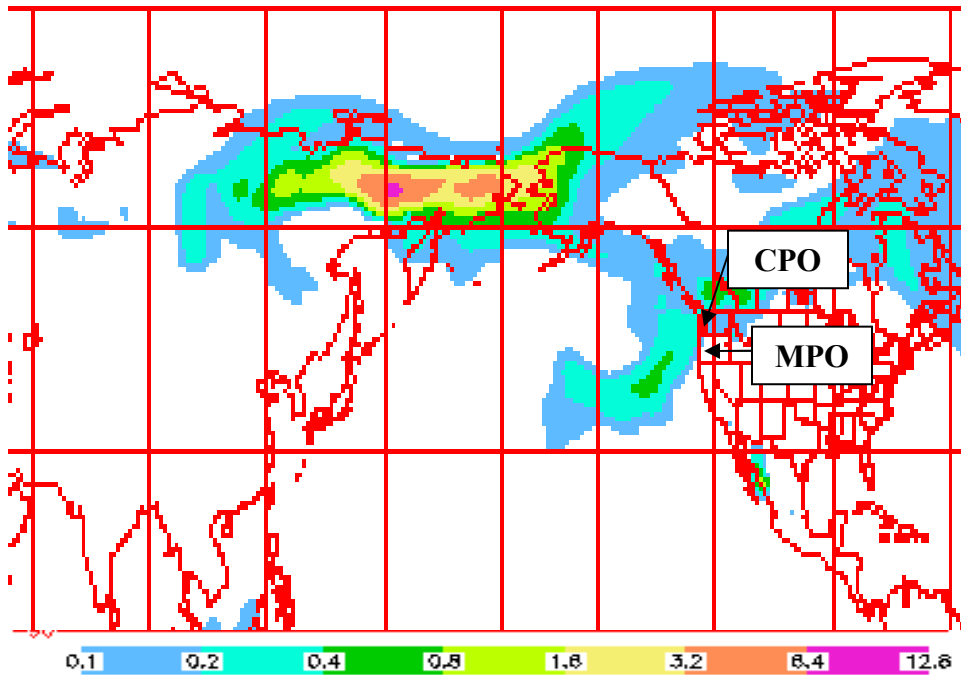

B. Representative image during the August 4 concurrent sampling at CPO and MPO.

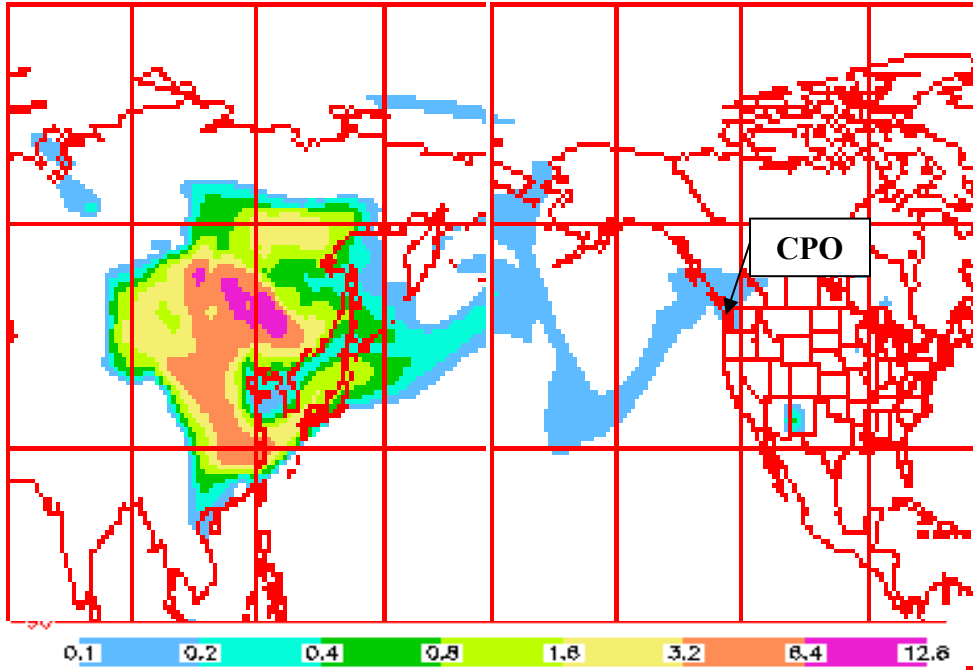

C. Representative image during the June 16 sampling at CPO.

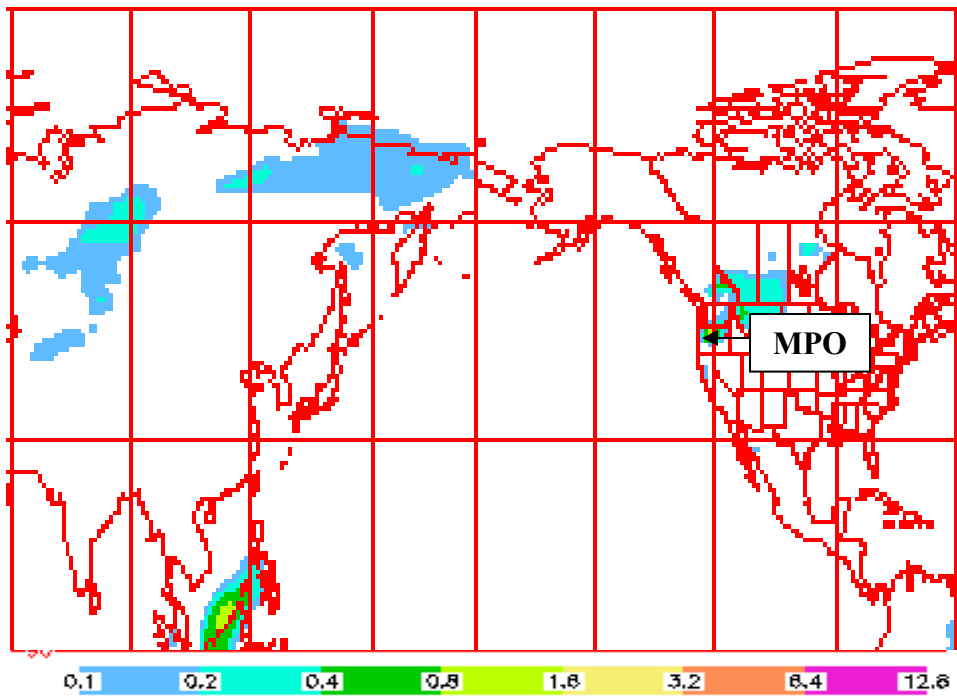

D. Representative image during the September 4 sampling at MPO.

**Table S.2A.** Concentrations of PAHs that exist primarily in the gas phase (ACE, FLO, PHE, ANT, FLA, PYR, RET) and particulate phase (BaA, CHR, BbF, BkF, BeP, BaP, IcdP, BghiP) in the atmosphere (pg/m<sup>3</sup>) in MPO and CPO air samples collected during 2003.

| Sample # | Sampling Location | Sampling start date | ACE  | FLO   | PHE  | ANT  | FLA  | PYR  | RET  | BaA  | CHR  | BbF  | BkF  | BeP  | BaP  | IcdP | BghiP | LEV   |
|----------|-------------------|---------------------|------|-------|------|------|------|------|------|------|------|------|------|------|------|------|-------|-------|
| 1R       | CPO               | 11-Apr              | <DL  | 256   | 170  | <DL  | 41.0 | 1.71 | <DL  | 14.8 | 6.98 | <DL  | <DL  | <DL  | <DL  | <DL  | <DL   | 16000 |
| 2        | CPO               | 21-Apr              | <DL  | 54.3  | 75.9 | <DL  | 18.8 | 12.2 | <DL  | <DL  | <DL  | 4.96 | <DL  | 1.73 | <DL  | <DL  | <DL   | 654   |
| 3        | CPO               | 2-May               | <DL  | 49.81 | 125  | <DL  | 23.2 | 16.3 | <DL  | <DL  | <DL  | 9.94 | <DL  | <DL  | <DL  | <DL  | <DL   | 381   |
| 4        | MPO               | 11-May              | <DL  | 155   | 199  | <DL  | 38.1 | 69.2 | 38.8 | 4.47 | 4.00 | <DL  | <DL  | <DL  | <DL  | <DL  | 3.98  | <DL   |
| 5        | MPO               | 21-May              | <DL  | 258   | 558  | <DL  | 81.9 | 93.6 | 66.4 | 5.43 | 3.83 | <DL  | <DL  | <DL  | <DL  | <DL  | 4.75  | 22600 |
| 6        | MPO               | 26-May              | <DL  | 43.5  | 55.2 | <DL  | 8.71 | 19.0 | 11.3 | <DL  | 1.03  | <DL   |
| 7        | MPO               | 30-May              | <DL  | 21.5  | 27.4 | <DL  | 0.74 | 25.7 | <DL  | <DL  | <DL  | <DL  | <DL  | 1.63 | <DL  | 2.42 | 1.01  | <DL   |
| 8S       | MPO               | 2-Jun               | 72.4 | 165   | 274  | <DL  | 29.5 | 28.8 | 21.0 | <DL  | 12.0 | 8.47 | 32.6 | 13.8 | <DL  | 13.7 | 7.47  | 32300 |
| 9S       | CPO               | 2-Jun               | <DL  | 55.7  | 184  | <DL  | 91.5 | 92.2 | 41.2 | <DL  | <DL  | <DL  | 11.2 | <DL  | <DL  | <DL  | <DL   | <DL   |
| 10S      | CPO               | 16-Jun              | <DL  | 51.5  | 306  | <DL  | 200  | 236  | 84.5 | <DL   | <DL   |
| 11       | MPO               | 22-Jun              | <DL  | 38.4  | 121  | <DL  | 13.4 | 23.6 | 23.3 | <DL  | 0.89  | 3440  |
| 12       | MPO               | 4-Jul               | <DL  | 97.7  | 127  | <DL  | 28.4 | 41.8 | 27.2 | 5.43 | <DL  | <DL  | <DL  | <DL  | <DL  | 2.31 | 3.05  | <DL   |
| 13       | CPO               | 7-Jul               | <DL  | <DL   | 68.5 | <DL  | 20.2 | 21.2 | <DL   | <DL   |
| 14       | MPO               | 22-Jul              | 149  | 522   | 1120 | <DL  | 246  | 376  | 156  | <DL   | 3980  |
| 15       | MPO               | 2-Aug               | 3.69 | 56.5  | 91.6 | <DL  | 29.6 | 57.0 | <DL  | <DL  | <DL  | <DL  | <DL  | 2.97 | <DL  | 3.10 | 2.00  | <DL   |
| 16S      | MPO               | 4-Aug               | 72.0 | 205   | 235  | <DL  | 62.3 | 115  | 70.3 | <DL  | <DL  | <DL  | <DL  | 4.90 | <DL  | <DL  | 4.23  | 33800 |
| 17S      | CPO               | 4-Aug               | <DL  | 14.6  | 169  | <DL  | 107  | 143  | 42.1 | <DL   | 1980  |
| 18       | MPO               | 8-Aug               | 137  | 153   | 656  | 25.5 | 102  | 263  | 74.7 | <DL  | <DL  | <DL  | <DL  | 52.2 | <DL  | <DL  | 2.38  | 2750  |
| 19       | MPO               | 12-Aug              | 88.0 | 240   | 824  | <DL  | 103  | 261  | 80.1 | <DL  | <DL  | <DL  | <DL  | <DL  | <DL  | 4.30 | 4.07  | 0     |
| 20R      | MPO               | 4-Sep               | 431  | 483   | 2230 | 125  | 330  | 1070 | 303  | <DL  | <DL  | <DL  | <DL  | 321  | 20.1 | <DL  | 5.96  | 17100 |
| 21T      | MPO               | 21-Sep              | <DL  | 215   | 682  | <DL  | 52.8 | 69.2 | 48.0 | 19.9 | 5.11 | <DL  | <DL  | 10.7 | 35.0 | 8.91 | 9.43  | 472   |

indicates concurrent samples

**Abbreviations:** ACE=acenaphthene, FLO = fluorene, PHE = phenanthrene, ANT = anthracene, FLA = fluoranthene, PYR = pyrene, RET = retene, BaA = Benzo[a]anthracene = chrysene and triphenylene, BbF = Benzo[b]fluoranthene, BkF = Benzo[k]fluoranthene, BeP = Benzo[e]pyrene, BaP = Benzo[a]pyrene, IcdP = Indeno[1,2,3-cd]pyrene, BghiP = Benzo[ghi]perylene, LEV = levoglucosan, 1,3,5 TPB = 1,3,5 triphenylbenzene



**Table S.2B. Percent of individual PAHs in the particulate phase for each sampling date. NA signifies that a percentage could not be determined because both the gas and particulate phase PAH concentrations were below the detection limit.**

| <i>Sample #</i> | <i>Sampling Location</i> | <i>Sampling start date</i> | <i>ACE</i> | <i>FLO</i> | <i>PHE</i> | <i>ANT</i> | <i>FLA</i> | <i>PYR</i> | <i>RET</i> | <i>BaA</i> | <i>CHR</i> | <i>BbF</i> | <i>BkF</i> | <i>BeP</i> | <i>BaP</i> | <i>IcdP</i> | <i>BghiP</i> |
|-----------------|--------------------------|----------------------------|------------|------------|------------|------------|------------|------------|------------|------------|------------|------------|------------|------------|------------|-------------|--------------|
| 1R              | CPO                      | 11-Apr                     | NA         | 2.69       | 6.42       | NA         | 9.95       | NA         | 100        | 50.1       | 49.9       | NA         | NA         | NA         | NA         | NA          | NA           |
| 2               | CPO                      | 21-Apr                     | NA         | 8.29       | 14.1       | NA         | 10.4       | 16.9       | 100        | 100        | 100        | 100        | NA         | 100        | NA         | 100         | NA           |
| 3               | CPO                      | 2-May                      | NA         | 15.4       | 9.27       | NA         | 4.92       | 10.8       | 100        | 100        | 100        | 100        | 100        | NA         | NA         | NA          | NA           |
| 4               | MPO                      | 11-May                     | NA         | NA         | 11.4       | NA         | 24.9       | 11.6       | 24.7       | 100        | 100        | NA         | NA         | NA         | NA         | NA          | 100          |
| 5               | MPO                      | 21-May                     | NA         | NA         | 3.82       | NA         | 15.8       | 11.5       | 27.6       | 100        | 100        | NA         | NA         | NA         | NA         | NA          | 100          |
| 6               | MPO                      | 26-May                     | NA         | NA         | 5.88       | NA         | 15.4       | 9.98       | 29.1       | NA          | 100          |
| 7               | MPO                      | 30-May                     | NA         | NA         | 14.1       | NA         | NA         | 8.12       | NA         | 100         | 100          |
| 8S              | MPO                      | 2-Jun                      | 100        | NA         | 22.1       | NA         | 31.9       | 29.6       | 100        | NA         | 100        | 100        | 100        | 100        | NA         | 100         | 100          |
| 9S              | CPO                      | 2-Jun                      | NA         | 9.77       | 5.47       | NA         | NA         | 4.81       | 11.5       | NA         | NA         | NA         | 80.3       | 100        | NA         | NA          | NA           |
| 10S             | CPO                      | 16-Jun                     | NA         | 7.78       | 2.74       | NA         | NA         | 1.39       | 6.07       | NA          | NA           |
| 11              | MPO                      | 22-Jun                     | NA         | NA         | 13.6       | NA         | 9.02       | 6.71       | 19.1       | NA          | 100          |
| 12              | MPO                      | 4-Jul                      | NA         | NA         | 5.20       | NA         | 8.21       | 6.51       | 13.7       | 0          | NA         | NA         | NA         | NA         | NA         | 0           | 45.9         |
| 13              | CPO                      | 7-Jul                      | NA         | NA         | 2.99       | NA         | NA         | 3.04       | NA          | NA           |
| 14              | MPO                      | 22-Jul                     | NA         | 0          | 3.05       | NA         | 4.87       | 3.90       | 20.2       | NA          | NA           |
| 15              | MPO                      | 2-Aug                      | NA         | NA         | 11.2       | NA         | 11.8       | 6.64       | NA         | NA         | NA         | NA         | NA         | 100        | NA         | 100         | 100          |
| 16S             | MPO                      | 4-Aug                      | NA         | NA         | 8.19       | NA         | 7.06       | 5.70       | 32.7       | NA         | NA         | NA         | NA         | 100        | NA         | NA          | 100          |
| 17S             | CPO                      | 4-Aug                      | NA         | NA         | 4.18       | NA         | NA         | 0.23       | NA          | NA           |
| 18              | MPO                      | 8-Aug                      | NA         | NA         | 14.5       | NA         | 10.2       | 3.29       | 12.0       | NA         | 100        | NA         | NA         | 0          | NA         | NA          | 100          |
| 19              | MPO                      | 12-Aug                     | NA         | NA         | 6.95       | NA         | 7.65       | 3.62       | 14.2       | NA         | NA         | NA         | NA         | NA         | NA         | 100         | 100          |
| 20R             | MPO                      | 4-Sep                      | NA         | NA         | 4.30       | NA         | 6.03       | 1.57       | 11.6       | NA         | NA         | NA         | NA         | 0          | 0          | NA          | 100          |
| 21T             | MPO                      | 21-Sep                     | NA         | 4.16       | 7.97       | NA         | 23.5       | 16.8       | 41.1       | 100        | 100        | NA         | NA         | 100        | 0          | 100         | 100          |

**Figure S.3.** PCA biplot of normalized, centered log ratio transformed (A) PAH and (B) Pesticide concentrations measured at MPO and CPO during 2003. The numbers correspond to sample numbers in Tables SI.2. The letters next to the sample number indicate samples influenced by Siberian biomass burning emissions (S) and regional fires (R).

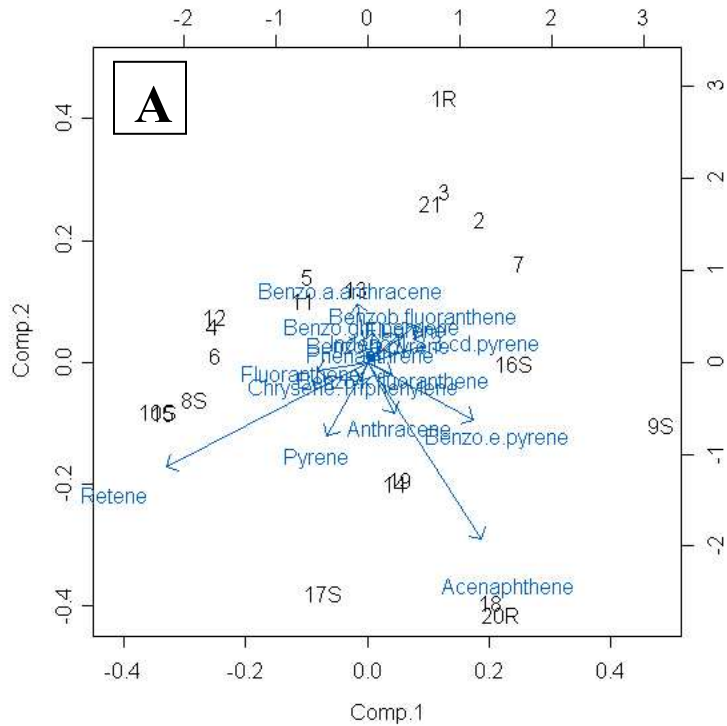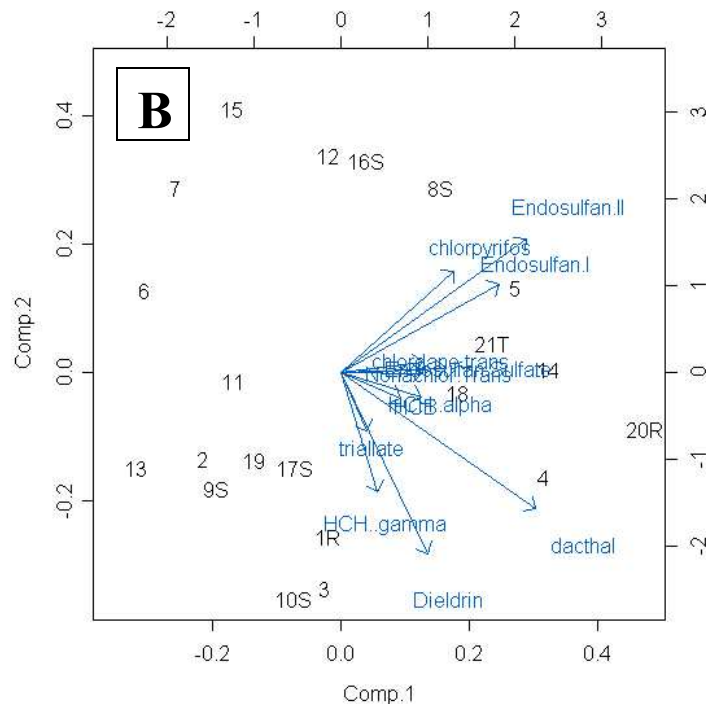

**Table S.3.** Pesticide concentrations (pg/m<sup>3</sup>) in MPO and CPO air samples collected during 2003

| Sample # | Sampling Location | Sampling start date | HCB  | alpha-HCH | gamma-HCH | alpha HCH / gamma HCH ratio | Triallate | Dacthal | Chlorpyrifos | Chlordane, trans | Endosulfan I | Nonachlor, trans | Dieldrin | Endosulfan II | Endosulfan sulfate |
|----------|-------------------|---------------------|------|-----------|-----------|-----------------------------|-----------|---------|--------------|------------------|--------------|------------------|----------|---------------|--------------------|
| 1R       | CPO               | 11-Apr              | 38.6 | 13.6      | 4.57      | 2.96                        | 6.31      | 9.44    | <DL          | 0.28             | 12.1         | <DL              | 3.00     | <DL           | <DL                |
| 2        | CPO               | 21-Apr              | 43.3 | 15.6      | 5.06      | 3.08                        | <DL       | <DL     | <DL          | <DL              | 2.53         | <DL              | 6.46     | <DL           | <DL                |
| 3        | CPO               | 2-May               | 36.2 | 14.4      | 6.70      | 2.15                        | 2.40      | 8.79    | <DL          | 0.22             | 6.49         | <DL              | 11.7     | <DL           | <DL                |
| 4        | MPO               | 11-May              | 30.1 | 12.6      | 5.27      | 2.39                        | 5.85      | 32.6    | 1.88         | 0.64             | 62.4         | 0.56             | 13.9     | 6.66          | 0.62               |
| 5        | MPO               | 21-May              | 29.0 | 13.3      | 3.30      | 4.04                        | <DL       | 2.07    | 4.49         | 0.96             | 64.9         | 0.67             | 6.38     | 26.6          | 1.12               |
| 6        | MPO               | 26-May              | 9.82 | 3.84      | 0.96      | 4.01                        | <DL       | <DL     | 0.37         | 0.23             | 3.86         | 0.16             | <DL      | <DL           | <DL                |
| 7        | MPO               | 30-May              | 11.3 | 5.76      | 1.09      | 5.27                        | <DL       | 0.05    | 2.49         | <DL              | 5.30         | <DL              | <DL      | 0.84          | <DL                |
| 8S       | MPO               | 2-Jun               | 35.2 | 16.2      | 4.32      | 3.74                        | <DL       | 0.16    | 3.91         | 0.61             | 92.1         | 0.41             | 3.03     | 41.0          | 0.96               |
| 9S       | CPO               | 2-Jun               | 17.1 | 21.5      | 6.35      | 3.38                        | <DL       | <DL     | <DL          | <DL              | 3.24         | <DL              | 13.7     | <DL           | <DL                |
| 10S      | CPO               | 16-Jun              | 26.2 | 29.9      | 14.9      | 2.00                        | <DL       | 2.04    | <DL          | <DL              | 3.50         | <DL              | 40.1     | <DL           | <DL                |
| 11       | MPO               | 22-Jun              | 37.5 | 25.3      | 2.51      | 10.1                        | <DL       | 0.51    | 0.63         | 0.52             | 2.81         | 0.36             | 1.05     | 0.35          | 0.16               |
| 12       | MPO               | 4-Jul               | 13.2 | 6.41      | 1.00      | 6.41                        | 0.31      | 0.42    | 12.7         | 0.37             | 18.9         | 0.25             | <DL      | 4.16          | 0.30               |
| 13       | CPO               | 7-Jul               | 13.7 | <DL       | 4.64      | NA                          | <DL       | 0.29    | <DL          | <DL              | 0.83         | <DL              | 7.13     | <DL           | <DL                |
| 14       | MPO               | 22-Jul              | 81.1 | 37.0      | 7.20      | 5.13                        | <DL       | 3.67    | 4.16         | 1.79             | 24.8         | 1.42             | 11.0     | 14.2          | 3.23               |
| 15       | MPO               | 2-Aug               | 22.8 | 9.30      | <DL       | NA                          | <DL       | 0.03    | <DL          | <DL              | 61.8         | <DL              | <DL      | 4.53          | 0.30               |
| 16S      | MPO               | 4-Aug               | 25.1 | 17.1      | <DL       | NA                          | <DL       | 1.48    | 4.54         | <DL              | 45.4         | <DL              | <DL      | 5.23          | <DL                |
| 17S      | CPO               | 4-Aug               | 61.7 | 49.3      | 10.1      | 4.91                        | <DL       | <DL     | 0.70         | <DL              | 7.09         | <DL              | 21.6     | 0.73          | <DL                |
| 18       | MPO               | 8-Aug               | 84.3 | 53.1      | 3.91      | 13.6                        | <DL       | 5.65    | 2.42         | 0.75             | 26.2         | 0.67             | 4.75     | 3.26          | 0.30               |
| 19       | MPO               | 12-Aug              | 28.6 | 22.9      | 4.66      | 4.91                        | <DL       | <DL     | 0.32         | <DL              | 3.29         | <DL              | 10.0     | 0.34          | 2.31               |
| 20R      | MPO               | 4-Sep               | 82.6 | 29.9      | 4.99      | 5.99                        | <DL       | 101     | 3.46         | 1.37             | 117          | 1.41             | 9.57     | 9.95          | 8.16               |
| 21T      | MPO               | 21-Sep              | 80.1 | 50.4      | 8.33      | 6.05                        | <DL       | <DL     | 2.60         | 2.45             | 91.0         | 1.66             | 26.7     | 8.65          | 1.87               |

 indicates concurrent samples  
 <DL = below detection limit  
 NA = not applicable  
 S= influenced by Siberian biomass burning emissions  
 R= influenced by regional biomass burning emissions  
 T = influenced by trans-Pacific transport

**Table S.4** Significant Pearson correlation coefficients (R) (p-value <0.05) between PAH and pesticide concentrations measured at MPO: Hexachlorobenzene (HCB), alpha and gamma Hexachlorocyclohexane (a-HCH, g-HCH), Dacthal (Dac), Endosulfan I(Endo 1), Dieldrin (Dield), Endosulfan II(Endo2), Endosulfan Sulfate (EndoS), Sum Chlordanes ( $\Sigma$ Chlor), Sum Endosulfans ( $\Sigma$ Endos), Fluorene (FLO), Phenanthrene (PHE), Anthracene (ANT), Fluoranthene (FLA), Pyrene (PYR), Retene (RET), and Levoglucosan (Lev), NA = not applicable.

|                                  | HCB  | aHCH | gHCH | a/g<br>HCH<br>ratio | Dac  | ENDO1 | DIELD | ENDO2 | ENDOS | $\Sigma$<br>Chlor | $\Sigma$<br>Endo | FLO  | PHE  | ANT | FLA  | PYR  | RET  | Lev  |
|----------------------------------|------|------|------|---------------------|------|-------|-------|-------|-------|-------------------|------------------|------|------|-----|------|------|------|------|
| <b>HCB</b>                       | NA   | 0.94 | 0.78 |                     |      |       |       |       |       | 0.78              |                  | 0.72 | 0.79 |     | 0.70 | 0.65 | 0.66 |      |
| <b>aHCH</b>                      | 0.94 | NA   | 0.71 |                     |      |       |       |       |       | 0.65              |                  |      |      |     |      |      |      |      |
| <b>gHCH</b>                      | 0.78 | 0.71 | NA   |                     |      |       | 0.87  |       |       | 0.89              | 0.58             | 0.70 | 0.58 |     |      |      |      |      |
| <b>a/g ratio</b>                 |      |      |      | NA                  |      |       |       |       |       |                   |                  |      |      |     |      |      |      |      |
| <b>Dac</b>                       |      |      |      |                     | NA   | 0.66  |       |       | 0.86  |                   |                  | 0.63 | 0.82 |     | 0.79 | 0.86 | 0.83 |      |
| <b>ENDO1</b>                     |      |      | 0.60 |                     |      | NA    |       |       |       |                   | 0.97             |      | 0.59 |     |      |      |      |      |
| <b>DIELD</b>                     |      |      | 0.87 |                     |      |       | NA    |       |       | 0.77              |                  |      |      |     |      |      |      |      |
| <b>ENDO2</b>                     |      |      |      |                     |      |       |       | NA    |       |                   | 0.66             |      |      |     |      |      |      | 0.57 |
| <b>ENDOS</b>                     |      |      |      |                     | 0.86 |       |       |       | NA    |                   |                  | 0.87 | 0.96 |     | 0.94 | 0.95 | 0.96 |      |
| <b><math>\Sigma</math> Chlor</b> | 0.78 | 0.65 | 0.89 |                     |      |       | 0.77  |       |       | NA                |                  |      |      |     |      |      |      |      |
| <b><math>\Sigma</math> Endo</b>  |      |      | 0.58 |                     |      | 0.97  |       | 0.66  |       |                   | NA               | 0.56 | 0.58 |     |      |      |      | 0.54 |
| <b>FLO</b>                       | 0.72 |      | 0.70 |                     |      |       |       |       | 0.87  | 0.75              | 0.56             | NA   | 0.91 |     | 0.91 | 0.84 | 0.90 |      |
| <b>PHE</b>                       | 0.79 |      | 0.58 |                     | 0.82 | 0.59  |       |       | 0.96  | 0.69              | 0.58             | 0.91 | NA   |     | 0.97 | 0.96 | 0.97 |      |
| <b>ANT</b>                       |      |      |      |                     | 0.93 |       |       |       | 0.87  |                   |                  | 0.58 | 0.83 | NA  | 0.84 | 0.91 | 0.86 |      |
| <b>FLA</b>                       | 0.70 |      |      |                     | 0.79 |       |       |       | 0.94  |                   |                  | 0.91 | 0.97 |     | NA   | 0.98 | 0.99 |      |
| <b>PYR</b>                       | 0.65 |      |      |                     | 0.86 |       |       |       | 0.95  |                   |                  | 0.84 | 0.96 |     | 0.98 | NA   | 0.98 |      |
| <b>RET</b>                       | 0.66 |      |      |                     | 0.83 |       |       |       | 0.96  |                   |                  | 0.90 | 0.97 |     | 0.99 | 0.98 | NA   |      |
| <b>Lev</b>                       |      |      |      |                     |      |       | 0.57  |       |       |                   | 0.54             |      |      |     |      |      |      |      |

**Table S.5.** Significant Pearson correlation coefficients (R) (p-value <0.05) between PAH and pesticide concentrations measured at CPO: Hexachlorobenzene(HCB), alpha and gamma Hexachlorocyclohexane (a-HCH, g-HCH), Dacthal (Dac), Endosulfan I(Endo 1), Dieldrin (Dield), Endosulfan II(Endo2), Endosulfan Sulfate (EndoS), Sum Chlordanes ( $\Sigma$ Chlor), Sum Endosulfans ( $\Sigma$ Endos), Fluorene (FLO), Phenanthrene (PHE), Anthracene (ANT), Fluoranthene (FLA), Pyrene (PYR), Retene (RET), and Levoglucosan (Lev).

|                | HCB  | aHCH  | gHCH | a/g<br>HCH<br>ratio | Dact  | Endo1 | Dield | Endo2 | EndoS | $\Sigma$<br>Chlor | $\Sigma$<br>Endo | FLO  | PHE  | ANT | FLA  | PYR  | RET  | Lev  |
|----------------|------|-------|------|---------------------|-------|-------|-------|-------|-------|-------------------|------------------|------|------|-----|------|------|------|------|
| HCB            | NA   |       |      |                     | 0.95  |       |       |       |       |                   |                  |      |      |     |      |      |      |      |
| aHCH           |      | NA    | 0.83 |                     | -0.99 |       | 0.89  |       |       |                   |                  |      |      |     | 0.92 | 0.98 | 0.93 |      |
| gHCH           |      | 0.83  | NA   |                     |       |       | 0.98  |       |       |                   |                  |      | 0.82 |     | 0.83 | 0.79 |      |      |
| a/g ratio      |      |       |      | NA                  |       |       |       |       |       |                   |                  |      |      |     |      |      |      |      |
| Dact           | 0.95 | -0.99 |      |                     | NA    |       |       |       |       |                   |                  |      |      |     |      |      |      |      |
| Endo1          |      |       |      |                     |       | NA    |       |       |       |                   |                  |      |      |     |      |      |      | 0.89 |
| Dield          |      | 0.89  | 0.98 |                     |       |       | NA    |       |       |                   |                  |      |      |     | 0.83 | 0.87 | 0.99 |      |
| Endo2          |      |       |      |                     |       |       |       |       |       |                   |                  |      |      |     |      |      |      |      |
| EndoS          |      |       |      |                     |       |       |       |       |       |                   |                  |      |      |     |      |      |      |      |
| $\Sigma$ Chlor |      |       |      |                     |       |       |       |       |       |                   |                  |      |      |     |      |      |      |      |
| $\Sigma$ Endo  |      |       |      |                     |       |       |       |       |       |                   |                  |      |      |     |      |      |      |      |
| FLO            |      |       |      |                     |       |       |       |       |       |                   |                  | NA   |      |     |      |      |      | 0.96 |
| PHE            |      |       | 0.82 |                     |       |       |       |       |       |                   |                  |      | NA   |     |      |      |      |      |
| ANT            |      |       |      |                     |       |       |       |       |       |                   |                  |      |      |     |      |      |      |      |
| FLA            |      | 0.92  | 0.83 |                     |       |       | 0.83  |       |       |                   |                  |      |      |     | NA   | 0.95 | 0.99 |      |
| PYR            |      | 0.98  | 0.79 |                     |       |       | 0.87  |       |       |                   |                  |      |      |     | 0.95 | NA   | 0.95 |      |
| RET            |      | 0.93  |      |                     |       |       | 0.99  |       |       |                   |                  |      |      |     | 0.99 | 0.95 | NA   |      |
| Lev            |      |       |      |                     |       | 0.89  |       |       |       |                   |                  | 0.96 |      |     |      |      |      | NA   |

**Table S.6.** Concentrations of pesticides and polychlorinated biphenyls (PCBs) (pg/g dry weight) and their percent difference in burned and un-burned soil from the B&B complex fire in the Deschutes National Forest, Oregon, site of the B&B complex forest fire.

|                      | <b>Un-burned<br/>soil pg/g dw</b> | <b>Burned soil<br/>pg/g dw</b> | <b>%<br/>difference</b> |
|----------------------|-----------------------------------|--------------------------------|-------------------------|
| Trifluralin          | 2.62                              | 1.73                           | 34                      |
| Hexachlorobenzene    | 140                               | 22.5                           | 84                      |
| HCH, alpha           | 1230                              | 35.8                           | 97                      |
| HCH, gamma (Lindane) | 99.0                              | 0.00                           | 100                     |
| Heptachlor           | 2.25                              | 0.00                           | 100                     |
| Dacthal              | 62.0                              | 5.92                           | 90                      |
| Chlorpyrifos oxon    | 10.6                              | 0.00                           | 100                     |
| Heptachlor epoxide   | 23.2                              | 0.00                           | 100                     |
| Chlordane, trans     | 24.6                              | 5.63                           | 77                      |
| Nonachlor, trans     | 27.5                              | 5.05                           | 82                      |
| Dieldrin             | 519                               | 0.00                           | 100                     |
| Endosulfan II        | 13.9                              | 6.20                           | 55                      |
| Endosulfan sulfate   | 184                               | 6.35                           | 97                      |
| PCB 153 (hexa)       | 62.7                              | 9.52                           | 85                      |
| PCB 138 (hexa)       | 89.2                              | 17.5                           | 80                      |
| PCB 187 (hepta)      | 31.7                              | 4.76                           | 85                      |
| PCB 183 (hepta)      | 10.6                              | 2.16                           | 80                      |
